# Supplementary material for: As It Stands: The Palouse Wild Cider Apple Breeding Program
Source: MDPI journal article supplement (doi:10.3390/plants11040517), 2022-02-14
Supplement: s1 [file s1]

**Table S2.** Greenhouse culling of seedlings of PWCabp 2019 families to result in vigorous, disease symptom-free seedlings for field planting. OP = Open pollinated: no flower emasculation or intentional application of particular parental pollen. Note: None of the families with “Red 2” as a parent gave red seedlings as expected so there was no culling for non-reds in these families; however, because an independent check in 2020 indicated that “Red 2” OP seeds indeed segregate 1:1 for the red phenotype (results not shown), we suspect that the “Red 2” pollinations in 2019 were unsuccessful.

| Parents of family      |                         | Estimated proportion wild background in seedlings of family<br>( <i>sieversii</i> , <u>other species</u> , domestica) | Total | No. seedlings culled and reason |                  |            |      | Kept, field-planted | Proportion culled |
|------------------------|-------------------------|-----------------------------------------------------------------------------------------------------------------------|-------|---------------------------------|------------------|------------|------|---------------------|-------------------|
| Mother                 | Father                  |                                                                                                                       |       | Powdery mildew                  | Apple cedar rust | Poor vigor | Dead |                     |                   |
| Breakwell’s Seedling   | N3-4b-25 (“Big Blush”)  | 25%, 75%                                                                                                              | 170   | 74                              | 83               | 1          | 3    | 9                   | 95%               |
| Liberty                | N3-4b-25 (“Big Blush”)  | 25%, 75%                                                                                                              | 126   | 49                              | 51               | 17         | 3    | 6                   | 95%               |
| Cox’s Orange Pippin    | N3-4b-25 (“Big Blush”)  |                                                                                                                       | 78    | 35                              | 35               | 0          | 0    | 8                   | 90%               |
| Red Summer Rambo       | N3-4b-25 (“Big Blush”)  | 25%, 75%                                                                                                              | 18    | 5                               | 3                | 6          | 0    | 4                   | 78%               |
| Hewe’s Crab            | N3-4b-25 (“Big Blush”)  |                                                                                                                       | 12    | 4                               | 3                | 3          | 1    | 1                   | 92%               |
| Delicious              | “Big Blush” and “Red 2” |                                                                                                                       | 157   | 80                              | 68               | 3          | 1    | 5                   | 97%               |
| Delicious              | N3-4b-25 (“Big Blush”)  | 25%, 75%                                                                                                              | 22    | 9                               | 8                | 0          | 0    | 5                   | 77%               |
| Delicious              | S4-3a-9 (“Red 2”)       | 28%, <u>7%</u> , 65%                                                                                                  | 9     | 4                               | 5                | 0          | 0    | 0                   | 100%              |
| N3-4b-25 (“Big Blush”) | S4-3a-9 (“Red 2”)       | 53%, <u>7%</u> , 40%                                                                                                  | 91    | 6                               | 39               | 35         | 1    | 10                  | 89%               |
| S4-4a-22 (“Red Io”)    | OP                      |                                                                                                                       | 2     | 0                               | 0                | 0          | 1    | 1                   | 50%               |
| S4-3a-26 (Red Jade OP) | Bramtot                 |                                                                                                                       | 28    | 0                               | 23               | 0          | 2    | 3                   | 89%               |
| S4-3a-26 (Red Jade OP) | Calville Rouge          |                                                                                                                       | 9     | 0                               | 4                | 2          | 1    | 2                   | 78%               |
| S4-3a-26 (Red Jade OP) | Frequin                 |                                                                                                                       | 8     | 3                               | 0                | 1          | 1    | 3                   | 63%               |
| S3-4b-25 (E14-32 OP)   | S4-3a-9 (“Red 2”)       | 28%, <u>7%</u> , 65%                                                                                                  | 21    | 4                               | 5                | 0          | 3    | 9                   | 57%               |

|                          |                                                 |                       |      |     |     |     |    |     |                  |
|--------------------------|-------------------------------------------------|-----------------------|------|-----|-----|-----|----|-----|------------------|
| S3-4b-25 (E14-32 OP)     | N3-4b-25 ("Big Blush")                          | 25%, 75%              | 16   | 4   | 11  | 0   | 1  | 0   | 100%             |
| S3-4b-25 (E14-32 OP)     | S4-3a-25 ("Red 1")                              | 12%, <u>25%</u> , 63% | 1    | 1   | 0   | 0   | 0  | 0   | 100% *           |
| S3-4b-10 ("Bitter Shot") | Bramtot                                         | <u>23%</u> , 77%      | 82   | 26  | 25  | 8   | 7  | 16  | 81%              |
| S3-4b-10 ("Bitter Shot") | Amere de Berthecourt                            | <u>23%</u> , 77%      | 77   | 21  | 44  | 1   | 5  | 6   | 92%              |
| S3-4b-10 ("Bitter Shot") | Frequin                                         | <u>23%</u> , 77%      | 65   | 4   | 23  | 5   | 24 | 9   | 86%              |
| S3-4b-10 ("Bitter Shot") | Calville Rouge                                  | <u>23%</u> , 77%      | 22   | 7   | 7   | 0   | 3  | 5   | 77%              |
| S4-3a-25 ("Red 1")       | Wickson Crab                                    |                       | 132  | 79  | 4   | 31  | 5  | 13  | 90% *            |
| S4-3a-25 ("Red 1")       | Gros Launet                                     | 13%, <u>25%</u> , 62% | 100  | 37  | 23  | 11  | 3  | 26  | 74% *            |
| Delicious                | "Red 1"                                         | 13%, <u>25%</u> , 62% | 25   | 16  | 5   | 1   | 0  | 3   | 88% *            |
| PRI 1773-6               | S1-1b-19 (red-fleshed site 6 <i>sieversii</i> ) | 50%, 50%              | 10   | 4   | 3   | 0   | 0  | 3   | 70% *            |
| PRI 1773-6               | Pendragon                                       |                       | 8    | 4   | 0   | 1   | 0  | 3   | 62% *            |
| S4-3a-26 (Red Jade OP)   | Pendragon                                       |                       | 6    | 0   | 0   | 0   | 3  | 3   | 50% *            |
| S4-3a-6 ("Red 6")        | OP                                              |                       | 2    | 2   | 0   | 0   | 0  | 0   | 100% *           |
| Total                    |                                                 |                       | 1297 | 478 | 472 | 126 | 68 | 153 | Ave. tot. % cull |
| Proportion               |                                                 |                       |      | 36% | 36% | 10% | 5% | 12% | 88%              |

\*Only red seedlings selected for this family. Selected as newly germinated seeds with a red radicle (Figure 2g). Expected ratio of red to non-red phenotypes in a family generated with one parent heterozygous for the red flesh allele is 1:1.
