# Supplementary material for: As It Stands: The Palouse Wild Cider Apple Breeding Program
Source: MDPI journal article supplement (doi:10.3390/plants11040517), 2022-02-14
Supplement: s1 [file s1]

**Table S3.** Greenhouse culling of seedlings of PWCabp 2020 families to result in vigorous, disease symptom-free seedlings for field planting. OP = Open pollinated: no flower emasculation or intentional application of particular parental pollen.

| Parents of family        |                                           | Estimated proportion wild background in seedlings of family<br>( <i>sieversii</i> , <u>other species</u> , domestica) | Total No. seedlings in family | No. seedlings culled and reason |                  |            |      | Kept, field-planted | Proportion culled |
|--------------------------|-------------------------------------------|-----------------------------------------------------------------------------------------------------------------------|-------------------------------|---------------------------------|------------------|------------|------|---------------------|-------------------|
| Mother                   | Father                                    |                                                                                                                       |                               | Powdery mildew                  | Apple cedar rust | Poor vigor | Dead |                     |                   |
| WSU cv2                  | GMAL 2251                                 | 50%, 50%                                                                                                              | 52                            | 39                              | 0                | 0          | 0    | 13                  | 75%               |
| WSU cv2                  | GMAL 4002.h A-4/5<br>0.2 ("Bitter Cream") | 50%, 50%                                                                                                              | 28                            | 16                              | 3                | 0          | 0    | 9                   | 68%               |
| WSU cv2                  | N3-4a-26 ("Bitter Bomb")                  | 50%, 50%                                                                                                              | 12                            | 4                               | 4                | 0          | 0    | 4                   | 66%               |
| WSU cv2                  | S3-1a-24 ("Bitter Weeping")               | 50%, 50%                                                                                                              | 9                             | 4                               | 0                | 0          | 0    | 5                   | 44%               |
| WSU cv1                  | GMAL 2251                                 | 50%, 50%                                                                                                              | 71                            | 43                              | 3                | 10         | 1    | 14                  | 80%               |
| WSU cv1                  | GMAL 4002.h A-4/5<br>0.2 ("Bitter Cream") | 50%, 50%                                                                                                              | 66                            | 45                              | 9                | 0          | 0    | 12                  | 82%               |
| WSU cv1                  | N3-4a-26 ("Bitter Bomb")                  | 50%, 50%                                                                                                              | 69                            | 37                              | 21               | 1          | 4    | 6                   | 91%               |
| WSU cv1                  | S3-1a-24 ("Bitter Weeping")               | 50%, 50%                                                                                                              | 32                            | 24                              | 0                | 1          | 1    | 6                   | 81%               |
| S4-4a-22 ("Red Io")      | GMAL 2251                                 | 62%, <u>25%</u> , 13%                                                                                                 | 2                             | 0                               | 0                | 0          | 0    | 2                   | 0%                |
| GMAL 2251                | S4-1b-20<br>("Red 11")                    | 63%, <u>9%</u> , 28%                                                                                                  | 27                            | 15                              | 5                | 0          | 1    | 6                   | 78% *             |
| GMAL 2251                | S4-2b-7 ("Red 8")                         | 63%, <u>25%</u> , 12%                                                                                                 | 19                            | 5                               | 5                | 0          | 0    | 9                   | 53% *             |
| S3-4b-10 ("Bitter Shot") | OP                                        |                                                                                                                       | 16                            | 5                               | 2                | 0          | 1    | 8                   | 50% *             |
| S4-4a-22 ("Red Io")      | OP                                        |                                                                                                                       | 7                             | 4                               | 1                | 0          | 1    | 1                   | 86% *             |
| S4-3b-7 ("Red 5")        | OP                                        |                                                                                                                       | 5                             | 3                               | 0                | 0          | 0    | 2                   | 60% *             |
| S3-4b-10 ("Bitter Shot") | OP                                        |                                                                                                                       | 342                           | 219                             | 59               | 37         | 5    | 22                  | 93%               |
| Total                    |                                           |                                                                                                                       |                               |                                 |                  |            |      |                     | Ave. tot. %       |
|                          |                                           |                                                                                                                       | 757                           | 463                             | 112              | 49         | 14   | 119                 | cull              |
| Proportion               |                                           |                                                                                                                       |                               | 61%                             | 15%              | 6%         | 2%   | 16%                 | 84%               |

\*Only red seedlings selected for this family. Selected as newly germinated seeds with a red radicle (Figure 2g). Expected ratio of red to non-red phenotypes in a family generated with one parent heterozygous for the red flesh allele is 1:1.
