# Supplementary material for: As It Stands: The Palouse Wild Cider Apple Breeding Program
Source: MDPI journal article supplement (doi:10.3390/plants11040517), 2022-02-14
Supplement: s1 [file s1]

**Table S4.** Genetic features of seedlings unique to the PWCabp selected for advanced evaluation and/or used as parents. Determinations and estimations were based on analyses of 20K SNP array data. “Bittersweet” indicates high bitterness and low acidity. “Very short juvenility” indicates flowering in 3rd leaf while “short juvenility” indicates 4th leaf. “Small fruit” indicates at least golf ball size. OP = Open pollinated: no flower emasculation and intentional application of particular parental pollen.

| Selection                               | Moniker                | Distinctive attributes<br>( <u>enhancing</u> , <u>essential</u> , <u>undesirable</u> ,<br>interesting/different)                                                                        | Origin                     | Parentage, intended                                                             | Parentage, determined                         |                                                 | <i>Malus</i> species<br>composition,<br>estimated*                          |
|-----------------------------------------|------------------------|-----------------------------------------------------------------------------------------------------------------------------------------------------------------------------------------|----------------------------|---------------------------------------------------------------------------------|-----------------------------------------------|-------------------------------------------------|-----------------------------------------------------------------------------|
|                                         |                        |                                                                                                                                                                                         |                            |                                                                                 | Mother                                        | Father                                          |                                                                             |
| GMAL 4002.h A-4/5<br>0.2 (PWC N1-4b-14) | Bitter<br>Cream        | <b>bittersweet and non-astringent, small fruit</b> , creamy-yellow bluishless skin, <i>biennial bearing</i>                                                                             | Kazakhstan<br>"site 6"     | GMAL 3785.b ( <i>M. sieversii</i> ) × pollen pool D-4/5 ( <i>M. sieversii</i> ) | GMAL 4002.h (KAZ 95 18-02P-33, PI 657083)     | unknown sieversii of site 6's pollen pool A-4/5 | 100% <i>sieversii</i>                                                       |
| GMAL 3762.h A-06<br>0.4 (PWC N1-4b-2)   | Pink Puma              | <u>red flesh and tree</u> , <b>bittersweet, non-astringent, small fruit</b> , <i>biennial bearing</i> , <i>PM susceptible</i>                                                           | Kazakhstan<br>"site 9"     | GMAL 3762.h ( <i>M. sieversii</i> ) × pollen pool C-06 ( <i>M. sieversii</i> )  | GMAL 3762.h (KAZ 95 05-01P-3.3, PI 657058)    | GMAL 3781.c (KAZ 95 05-01P-22.2, PI 657064)     | 100% <i>sieversii</i>                                                       |
| PWC N3-4b-25                            | Big Blush              | <u>very short juvenility, right-angled branches</u> , <b>small fruit</b> (larger and blushed compared to sieversii parent), <i>only slightly bitter, slightly astringent and acidic</i> | PWCabp 2013<br>OP families | GMAL 3614.a A-4/5 0.2 ( <i>M. sieversii</i> , Kazakhstan "site 9") OP           | unknown sieversii (not GMAL 3614.a A-4/5 0.2) | Haralson                                        | 50% <i>domestica</i> ,<br>50% <i>sieversii</i>                              |
| PWC N3-4b-12                            | Yellow<br>Tiny         | <u>very short juvenility</u> , yellow-skinned without blush, <i>tiny fruit, astringent, not bitter</i>                                                                                  | PWCabp 2013<br>OP families | GMAL 1890 ( <i>M. prunifolia</i> ) OP                                           | GMAL 1890                                     | unknown tiny-fruited in baccata group           | 50% <i>prunifolia</i> , 50% <i>baccata</i>                                  |
| PWC N3-3b-7                             | Red-<br>Yellow<br>Tiny | <u>very short juvenility</u> , yellow-skinned with blush, <i>tiny fruit, astringent, not bitter</i>                                                                                     | PWCabp 2013<br>OP families | GMAL 1890 ( <i>M. prunifolia</i> ) OP                                           | GMAL 1890                                     | unknown tiny-fruited in baccata group           | 50% <i>prunifolia</i> , 50% <i>baccata</i>                                  |
| PWC N3-2b-16                            | Orange<br>Tiny         | <u>very short juvenility</u> , orange-skinned without blush, <i>tiny fruit, astringent, not bitter</i>                                                                                  | PWCabp 2013<br>OP families | GMAL 2330 ( <i>M. baccata</i> ) OP                                              | GMAL 2330                                     | unknown tiny-fruited in baccata group           | 100% <i>baccata</i>                                                         |
| PWC S3-3b-1                             | Stripey                | <u>very short juvenility</u> , yellow-skinned with prominent stripes, very crisp, <i>tiny fruit, biennial bearing, not bitter</i>                                                       | PWCabp 2013<br>OP families | Kerr OP                                                                         | Kerr                                          | White Angel                                     | 56% <i>domestica</i> ,<br>44% <i>baccata</i> group                          |
| PWC S3-1a-24                            | Bitter<br>Weeping      | <b>bittersweet and non-astringent, small fruit</b> , <i>tip bearing</i>                                                                                                                 | PWCabp 2013<br>OP families | GMAL 2251 OP                                                                    | GMAL 2251                                     | unknown sieversii                               | 100% <i>sieversii</i>                                                       |
| PWC N3-4a-26                            | Bitter<br>Bomb         | <b>bittersweet and non-astringent, small fruit</b> , <i>biennial bearing</i>                                                                                                            | PWCabp 2013<br>OP families | GMAL 3614.a A-4/5 0.2 ( <i>M. sieversii</i> ) OP                                | unknown sieversii (not GMAL 3614.a A-4/5 0.2) | unknown sieversii                               | 100% <i>sieversii</i>                                                       |
| PWC S3-4b-10                            | Bitter<br>Shot         | <b>bittersweet and non-astringent</b> , <i>tiny fruit, biennial bearing</i>                                                                                                             | PWCabp 2013<br>OP families | PRI E14-32 OP                                                                   | PRI E14-32                                    | unknown tiny-fruited, very close to White Angel | 55% <i>domestica</i> ,<br>44% <i>baccata</i> group,<br>1% <i>floribunda</i> |

Table S4 cont'd.

| Selection    | Moniker | Distinctive attributes<br>(enhancing, essential, undesirable,<br>interesting/different)                                                                                          | Origin                     | Parentage, intended                                | Parentage, determined |                                       | Malus species<br>composition,<br>estimated*                         |
|--------------|---------|----------------------------------------------------------------------------------------------------------------------------------------------------------------------------------|----------------------------|----------------------------------------------------|-----------------------|---------------------------------------|---------------------------------------------------------------------|
|              |         |                                                                                                                                                                                  |                            |                                                    | Mother                | Father                                |                                                                     |
| PWC S4-3a-25 | Red 1   | <u>short juvenility</u> , <u>red flesh and tree</u> , <u>heavy annual bearing</u> , <u>tiny fruit</u> , <u>astringent</u> , <u>not bitter</u> , <u>fire blight susceptible</u>   | PWCabp 2014<br>OP families | Robert's Crab OP                                   | Robert's Crab         | unknown tiny-fruited in baccata group | 50% <i>baccata</i> , 25% <i>sieversii</i> , 25% <i>domestica</i>    |
| PWC S4-3a-9  | Red 2   | <u>short juvenility</u> , <u>red flesh</u> at core only, <u>red tree</u> , <u>right-angled branches</u> , <u>small fruit</u> , dessert-like taste, <u>not bitter</u>             | PWCabp 2014<br>families    | Novosibirski Sweet x<br>Robert's Crab              | Robert's Crab         | Novosibirski Sweet                    | 56% <i>sieversii</i> , 31% <i>domestica</i> , 13% <i>prunifolia</i> |
| PWC S4-3b-7  | Red 5   | <u>medium-sized fruit</u> , <u>red flesh and tree</u> , dessert-like taste, <u>biennial bearing</u> , <u>not bitter</u>                                                          | PWCabp 2014<br>OP families | Robert's Crab OP                                   | Robert's Crab         | Delicious                             | 75% <i>domestica</i> , 25% <i>sieversii</i>                         |
| PWC S4-3a-6  | Red 6   | <u>red flesh</u> in patches, <u>red tree</u> , <u>small fruit</u> , dessert-like, <u>not bitter</u> , <u>fire blight susceptible</u>                                             | PWCabp 2014<br>families    | Novosibirski Sweet x<br>Robert's Crab              | Robert's Crab         | Novosibirski Sweet                    | 56% <i>sieversii</i> , 31% <i>domestica</i> , 13% <i>prunifolia</i> |
| PWC S4-4b-25 | Red 7   | <u>red flesh and tree</u> , dessert-like, <u>tiny fruit</u> , <u>not bitter</u>                                                                                                  | PWCabp 2014<br>OP families | Robert's Crab OP                                   | Robert's Crab         | Delicious                             | 75% <i>domestica</i> , 25% <i>sieversii</i>                         |
| PWC S4-2b-7  | Red 8   | <u>red flesh and tree</u> , <u>small fruit</u> , <u>biennial bearing</u> , <u>astringent</u> , <u>not bitter</u>                                                                 | PWCabp 2014<br>OP families | Robert's Crab OP                                   | Robert's Crab         | unknown tiny-fruited in baccata group | 50% <i>baccata</i> , 25% <i>sieversii</i> , 25% <i>domestica</i>    |
| PWC S4-1b-20 | Red 11  | <u>deep red flesh</u> , <u>red tree</u> , <u>right-angled branches</u> , <u>small fruit</u> , dessert-like taste, very crisp, <u>not bitter</u> , <u>fire blight susceptible</u> | PWCabp 2014<br>families    | Robert's Crab x Kerr                               | Robert's Crab         | Kerr                                  | 56% <i>domestica</i> , 25% <i>sieversii</i> , 19% <i>baccata</i>    |
| PWC S4-4a-22 | Red 10  | <u>red flesh</u> at core only, <u>red tree</u> , <u>small fruit</u> , slightly lobed leaves, <u>astringent</u> , <u>somewhat spiny spurs</u> , <u>not bitter</u>                 | PWCabp 2014<br>families    | GMAL 2939 ( <i>M. ioensis</i> ) x<br>Robert's Crab | GMAL 2939             | Robert's Crab                         | 50% <i>ioensis</i> , 25% <i>sieversii</i> , 25% <i>domestica</i>    |

\* *Malus* species composition based on estimations that: PRI E14-32 has one *domestica* parent (unknown identity) and other parent ('Co-op 9') is 63/64 *domestica*, 1/64 *floribunda*; 'Dolgo' (parent of 'Kerr') and 'White Angel' are ~3/4 *baccata*, ~1/4 *domestica*; 'Robert's Crab' is ~1/2 *sieversii*, ~1/2 *domestica*; 'Novosibirski Sweet' is ~5/8 *sieversii*, ~1/4 *prunifolia*, ~1/8 *domestica*.
