# Supplementary material for: As It Stands: The Palouse Wild Cider Apple Breeding Program
Source: MDPI journal article supplement (doi:10.3390/plants11040517), 2022-02-14
Supplement: s1 [file s1]

Table S1. List of species genetics represented by PWCabp parents of seeds created from each year's crossings. In each year, most species were represented in multiple parental combinations.

| Species' genetics represented in PWCabp parents |                      |                       |                       |                      |                     |                      |                      |                      |                      |
|-------------------------------------------------|----------------------|-----------------------|-----------------------|----------------------|---------------------|----------------------|----------------------|----------------------|----------------------|
| Year                                            | 2013                 | 2014                  | 2015                  | 2016                 | 2017                | 2018                 | 2019                 | 2020                 | 2021                 |
| Species                                         | <i>M. baccata</i>    | <i>M. baccata</i>     | <i>M. domestica</i>   | <i>M. baccata</i>    | <i>M. baccata</i>   | <i>M. baccata</i>    | <i>M. baccata</i>    | <i>M. baccata</i>    | <i>M. domestica</i>  |
|                                                 | <i>M. domestica</i>  | <i>M. domestica</i>   | <i>M. ioensis</i>     | <i>M. domestica</i>  | <i>M. domestica</i> | <i>M. domestica</i>  | <i>M. domestica</i>  | <i>M. domestica</i>  | <i>M. ioensis</i>    |
|                                                 | <i>M. floribunda</i> | <i>M. floribunda</i>  | <i>M. ×micromalus</i> | <i>M. floribunda</i> | <i>M. ioensis</i>   | <i>M. ioensis</i>    | <i>M. ioensis</i>    | <i>M. ioensis</i>    | <i>M. prunifolia</i> |
|                                                 | <i>M. prunifolia</i> | <i>M. ioensis</i>     | <i>M. prunifolia</i>  | <i>M. fusca</i>      | <i>M. sieboldii</i> | <i>M. prunifolia</i> | <i>M. prunifolia</i> | <i>M. prunifolia</i> | <i>M. sieversii</i>  |
|                                                 | <i>M. sieversii</i>  | <i>M. ×micromalus</i> | <i>M. sieboldii</i>   | <i>M. ×robusta</i>   | <i>M. sieversii</i> | <i>M. sieversii</i>  | <i>M. sieversii</i>  | <i>M. sieversii</i>  |                      |
|                                                 | <i>M. ×soulardii</i> | <i>M. prunifolia</i>  | <i>M. sieversii</i>   | <i>M. ×zumi</i>      | <i>M. ×zumi</i>     | <i>M. ×zumi</i>      |                      |                      |                      |
|                                                 |                      | <i>M. sieversii</i>   |                       |                      |                     | <i>Malus spp.</i>    |                      |                      |                      |
|                                                 |                      | <i>M.</i>             |                       |                      |                     |                      |                      |                      |                      |
|                                                 |                      | <i>×atrosanguinea</i> |                       |                      |                     |                      |                      |                      |                      |
|                                                 |                      | <i>Malus spp.</i>     |                       |                      |                     |                      |                      |                      |                      |
