# Supplementary material for: As It Stands: The Palouse Wild Cider Apple Breeding Program
Source: Plants (Basel). 2022 Feb 14;11(4):517. doi: 10.3390/plants11040517 (PMC8877849; doi:10.3390/plants11040517)
Supplement: Supplementary file 1 [file plants-11-00517-s001.zip]

Archive with 5 entries (5 files):
- Figure S1 Phase 1 design submitted.pdf
- Table S1 species represented by parents - submitted.pdf
- Table S2 2019 Seedling culling - submitted.pdf
- Table S3 2020 Seedling culling - submitted.pdf
- Table S4 Selections, CWR use - submitted.pdf
